# Supplementary material for: Integrating sequence, expression and interaction data to determine condition-specific miRNA regulation
Source: PubMed Central journal article supplement — Bioinformatics. 2013 Jun 19;29(13):i89–97. doi: 10.1093/bioinformatics/btt231 (PMC3694655; doi:10.1093/bioinformatics/btt231), 2013-06-19
Supplement: supp_btt231_Le.294.sup.pdf [file supp_btt231_Le.294.sup.pdf]

# Supplementary materials for Integrating sequence, expression and interaction data to determine condition-specific miRNA regulation

Hai-Son Le<sup>1</sup> and Ziv Bar-Joseph<sup>1,2</sup>

<sup>1</sup> Machine Learning Department, <sup>2</sup> Lane Center for Computational Biology  
Carnegie Mellon University  
Pittsburgh, PA, USA  
{hple,zivbj}@cs.cmu.edu

## 1 Solving the optimization problem (4)

As discussed in Sect. 2.6, we solve the optimization (4) by an iterative procedure. We show here how to compute the gradients of the objective function, which are required for using minPQN. We begin with the objective function:

$$\mathcal{F} = -\log p(\mathbf{Y}|\mathbf{U}, \mathbf{V}, \mathbf{X}, \boldsymbol{\mu}, \boldsymbol{\Sigma}) - \sum_{i,j} \log p(\phi_{ij}|\mathbf{U}, \mathbf{V}) - \sum_{j \neq j'} \log p(\omega_{jj'} \neq 0|\mathbf{V}) \quad (1)$$

The first term can be expanded to :

$$\begin{aligned} & \log p(\mathbf{Y}|\mathbf{U}, \mathbf{V}, \mathbf{X}, \boldsymbol{\mu}, \boldsymbol{\Sigma}) \\ &= \sum_j \log \mathcal{N}(\mathbf{y}_j \mid \boldsymbol{\mu} - \mathbf{X}^T((\mathbf{I}_\Phi)_{,j} \circ (\mathbf{U}\mathbf{v}_j)), \boldsymbol{\Sigma}) \\ &= - \sum_j \sum_p \log(\sqrt{2\pi}\sigma_p) - \frac{1}{2} \left( \boldsymbol{\mu} - \mathbf{X}^T((\mathbf{I}_\Phi)_{,j} \circ (\mathbf{U}\mathbf{v}_j)) - \mathbf{y}_j \right)^T \boldsymbol{\Sigma}^{-1} \left( \boldsymbol{\mu} - \mathbf{X}^T((\mathbf{I}_\Phi)_{,j} \circ (\mathbf{U}\mathbf{v}_j)) - \mathbf{y}_j \right) \end{aligned}$$

(We abuse the notation in  $(\boldsymbol{\mu}^T - \mathbf{Y})$  a bit. When subtracting a matrix from a row vector, we need to vertically replicate the row vector.)

$$\begin{aligned} &= -N \sum_p \log(\sqrt{2\pi}\sigma_p) - \frac{1}{2} \text{Tr}\{(\boldsymbol{\mu}^T - \mathbf{Y})\boldsymbol{\Sigma}^{-1}(\boldsymbol{\mu}^T - \mathbf{Y})^T\} \\ &\quad + \text{Tr}\{(\boldsymbol{\mu}^T - \mathbf{Y})\boldsymbol{\Sigma}^{-1}((\mathbf{V}\mathbf{U}^T \circ \mathbf{I}_\Phi^T)\mathbf{X})^T\} - \frac{1}{2} \text{Tr}\{((\mathbf{V}\mathbf{U}^T \circ \mathbf{I}_\Phi^T)\mathbf{X})\boldsymbol{\Sigma}^{-1}((\mathbf{V}\mathbf{U}^T \circ \mathbf{I}_\Phi^T)\mathbf{X})^T\} \end{aligned}$$

Define:

$$\begin{aligned} \boldsymbol{\Phi}_* &= \boldsymbol{\Phi} + (1 - \mathbf{I}_\Phi) \\ \boldsymbol{\Omega}_* &= \boldsymbol{\Omega} + (1 - \mathbf{I}_\Omega) \end{aligned}$$

(basically replacing the zero entries with ones.)

We take the derivatives:

$$\frac{\partial \mathcal{F}}{\partial \mathbf{U}} = - \underbrace{(\mathbf{X}\Sigma^{-1}(\boldsymbol{\mu}^T - \mathbf{Y})^T) \circ \mathbf{I}_{\Phi} \mathbf{V} + \mathbf{X}\Sigma^{-1}\mathbf{X}^T((\mathbf{U}\mathbf{V}^T) \circ \mathbf{I}_{\Phi}) \circ \mathbf{I}_{\Phi} \mathbf{V}}_{\text{from } \partial \log p(\mathbf{Y}|\mathbf{U}, \mathbf{V}, \mathbf{X}, \boldsymbol{\mu}, \Sigma)} + \underbrace{\alpha(\sigma^{\Phi} - \mathbf{I}_{\Phi}) \circ \Phi_* \mathbf{V}}_{\text{from } \partial \sum_{i,j} \log p(I_{\phi_{ij}}|\mathbf{U}, \mathbf{V})}$$

where

$$\sigma^{\Phi} = \sigma(\alpha \Phi_* \circ (\mathbf{U}\mathbf{V}^T))$$

$$\frac{\partial \mathcal{F}}{\partial \mathbf{V}} = - \underbrace{((\boldsymbol{\mu}^T - \mathbf{Y})\Sigma^{-1}\mathbf{X}^T) \circ \mathbf{I}_{\Phi}^T \mathbf{U} + \left( ((\mathbf{U}\mathbf{V}^T) \circ \mathbf{I}_{\Phi})^T \mathbf{X}\Sigma^{-1}\mathbf{X}^T \right) \circ \mathbf{I}_{\Phi}^T \mathbf{U}}_{\text{from } \partial \log p(\mathbf{Y}|\mathbf{U}, \mathbf{V}, \mathbf{X}, \boldsymbol{\mu}, \Sigma)} + \underbrace{\beta(\sigma^{\Omega} - \mathbf{I}_{\Omega}) \circ \Omega \mathbf{V}}_{\text{from } \partial \sum_{i,j} \log p(I_{\omega_{jj'}}=1|\mathbf{V})} + \underbrace{\alpha(\sigma^{\Phi} - \mathbf{I}_{\Phi})^T \circ \Phi_*^T \mathbf{U}}_{\text{from } \partial \sum_{i,j} \log p(I_{\phi_{ij}}|\mathbf{U}, \mathbf{V})}$$

where

$$\sigma^{\Omega} = \sigma(\beta \Omega_* \circ (\mathbf{V}\mathbf{V}^T))$$

**Procedure** ProjectOnSimplex( $\mathbf{v}, C$ )

**output:**  $\arg \min_{\mathbf{w}} \|\mathbf{w} - \mathbf{v}\|_2$  s.t.  $\sum_i w_i \leq C, \mathbf{w} \geq 0$

**Procedure** Project( $\mathbf{U}, \mathbf{V}, C_1, C_2$ )

```

// Threshold
for i, k do
  | uik ← 0 if uik < ε ;
for j, k do
  | vjk ← 0 if vjk < ε ;
for k do
  // Remove redundant entries in U
  for i ∈ {i : uik > 0 and uik vkT φi = 0} do
    | uik ← 0 ;
  // Projection
  u,k ← ProjectOnSimplex(u,k, C1);
  v,k ← ProjectOnSimplex(v,k, C2);

```

**Fig. 1.** Projection procedure to solve the optimization problem (4)

## 2 Distribution of module sizes

Figure 2 shows the size of modules identified by SNMNMf and PIMiM. Modules identified by both methods have comparable size.

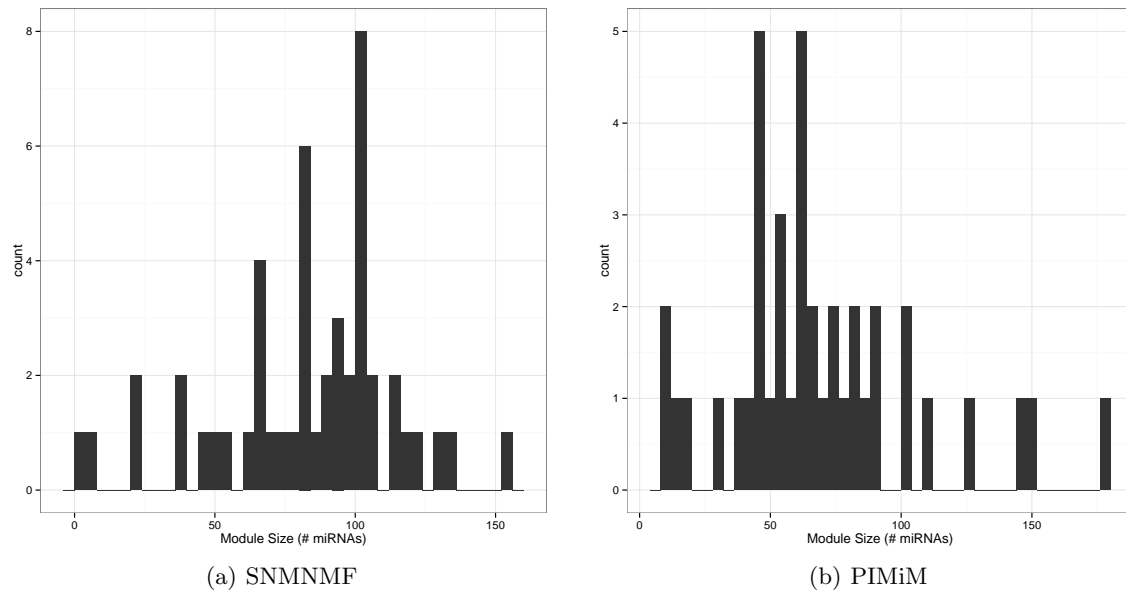

**Fig. 2.** The histogram of the size of modules of SNMNMf and PIMiM.

### 3 Choosing the parameter $K$ and $\alpha$

We select the parameter  $K$  of PIMiM that yields the best F1 score as shown in Fig. 3. In addition, we varied the values of  $\alpha$  to examine the interplay effect of predictions of miRNA targets and protein interaction data. The result is shown in Fig. 4.

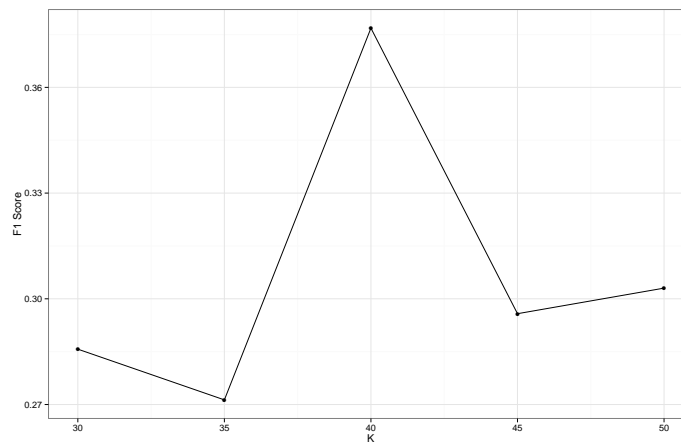

**Fig. 3.** Performance of PIMiM with different values of  $K$ .

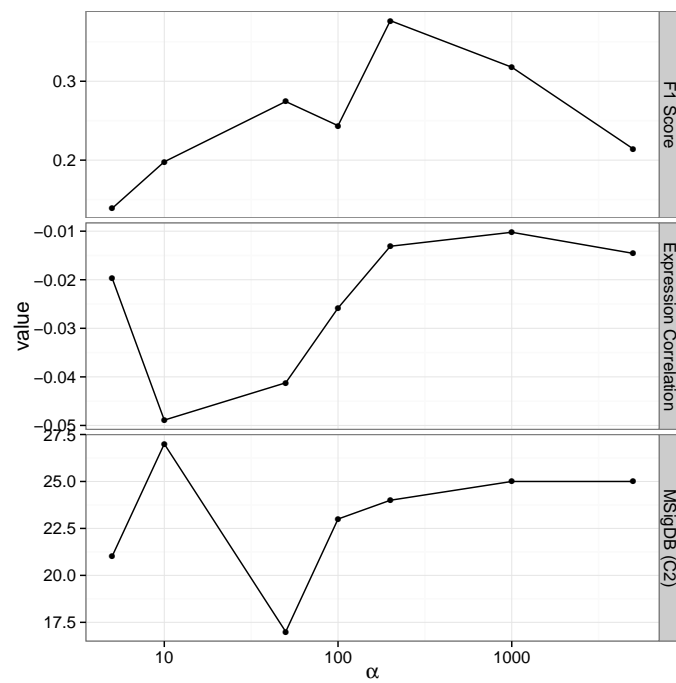

**Fig. 4.** We varied the value of  $\alpha$  and tested the different metrics discussed in Results. On one hand, low values and high values lead to smaller F1 score. On the other hand, small values lead to more coherent gene modules, which explains the better expression correlation.

Table 1: List of modules identified by PIMiM in ovarian cancer (Sect. 3.1): PPI: the number of protein interactions in TRANS-FAC between mRNAs, Interactions: the number of miRNA-mRNA interactions in MicroCosm.

| Module | #mirnas | #mrnas | ExpCorr (mirnas) | ExpCorr (mrnas) | ExpCorr   | PPI Interactions | MiRNAs                                                       | Enriched GO keywords                                                                                                                                                                                             |
|--------|---------|--------|------------------|-----------------|-----------|------------------|--------------------------------------------------------------|------------------------------------------------------------------------------------------------------------------------------------------------------------------------------------------------------------------|
| 1      | 4       | 8      | 0.278082         | 0.132891        | -0.002236 | 10               | mir-142-3p;mir-135a;mir-452;mir-144*                         |                                                                                                                                                                                                                  |
| 2      | 4       | 125    | 0.251864         | 0.025514        | -0.015311 | 392              | mir-514;mir-592;mir-26a-1*;mir-665                           | tumor necrosis factor, death receptor activity, positive regulation of NF-kappaB transcription factor, regulation of MAPKKK cascade, anti-apoptosis, programmed cell death, immune system process                |
| 3      | 6       | 81     | 0.221464         | 0.067253        | -0.013864 | 1916             | mir-30b*;mir-29a;mir-29c;mir-512-3p;mir-944;mir-338-3p       | ribosome, mitochondrial ribosome, mitochondrion                                                                                                                                                                  |
| 4      | 5       | 62     | 0.323695         | 0.026375        | -0.008652 | 84               | mir-133b;mir-133a;mir-223;mir-126*;mir-361-3p                | Ndc80 complex, blood coagulation, hemostasis                                                                                                                                                                     |
| 5      | 4       | 8      | 0.408359         | 0.218362        | -0.117000 | 6                | mir-516b;mir-183;mir-20a;mir-20b                             |                                                                                                                                                                                                                  |
| 6      | 5       | 89     | 0.257539         | 0.039119        | 0.003993  | 3002             | mir-940;mir-524-3p;mir-411;mir-601;mir-339-3p                | RNA splicing, mRNA export from nucleus, miRNA processing, spliceosomal complex                                                                                                                                   |
| 7      | 5       | 76     | 0.207695         | 0.038756        | -0.004794 | 410              | mir-23a;mir-23b;mir-125a-5p;mir-512-5p;mir-296-5p            | mediator complex, SWI/SNF complex, RNA polymerase II transcription cofactor act.                                                                                                                                 |
| 8      | 5       | 49     | 0.223381         | 0.042503        | -0.008279 | 62               | mir-519a;mir-584;mir-193a-5p;mir-215;mir-519c-3p             | cysteine-type endopeptidase activity, endoplasmic reticulum membran                                                                                                                                              |
| 9      | 6       | 69     | 0.223090         | 0.044989        | -0.007351 | 148              | mir-770-5p;mir-520a-5p;mir-362-5p;mir-525-5p;mir-627;mir-668 | CD40 receptor complex, integrin complex, programmed cell death, apoptosis, cell surface receptor linked signaling pathway                                                                                        |
| 10     | 5       | 72     | 0.251736         | 0.037899        | -0.001482 | 122              | mir-29b;mir-30c;mir-30b;mir-214;mir-145*                     | symbiont intracellular protein transport in host, MHC class II protein complex, interferon-gamma-mediated signaling pathway, lymphocyte activation, cytokine stimulus, immune response                           |
| 11     | 7       | 62     | 0.113588         | 0.023346        | 0.008720  | 150              | mir-326;mir-219-5p;mir-196b;mir-370;mir-218;mir-656;mir-874  | regulation of cellular senescence, cell aging, cyclin-dependent protein kinase holoenzyme complex, stress-activated MAPK cascade, MyD88-independent toll-like receptor signaling pathway, toll signaling pathway |
| 12     | 5       | 18     | 0.137023         | 0.066107        | -0.016920 | 30               | mir-141*;mir-27a;mir-345;mir-509-3-5p;mir-144                | catenin-TCFL2 complex                                                                                                                                                                                            |
| 13     | 6       | 64     | 0.168647         | 0.025391        | -0.006487 | 130              | mir-100;mir-99a;mir-519b-3p;mir-15b;mir-424;mir-339-3p       | cell cycle checkpoint, response to stress                                                                                                                                                                        |

|    |   |     |          |          |           |      |     |                                                                               |                                                                                                                                             |
|----|---|-----|----------|----------|-----------|------|-----|-------------------------------------------------------------------------------|---------------------------------------------------------------------------------------------------------------------------------------------|
| 14 | 8 | 62  | 0.176488 | 0.024091 | -0.007109 | 114  | 126 | mir-423-3p;mir-92b*;mir-183*;mir-484;mir-572;mir-324-3p;mir-324-5p;mir-296-5p | protein transmembrane transporter activity                                                                                                  |
| 15 | 3 | 38  | 0.444554 | 0.036937 | 0.005140  | 48   | 45  | mir-760;mir-362-5p;mir-874                                                    |                                                                                                                                             |
| 16 | 4 | 28  | 0.337957 | 0.045733 | -0.004327 | 66   | 36  | mir-129-3p;mir-491-3p;mir-221;mir-631                                         |                                                                                                                                             |
| 17 | 5 | 46  | 0.191255 | 0.026197 | -0.005014 | 94   | 78  | mir-518f;mir-455-3p;mir-378;mir-661;mir-873                                   |                                                                                                                                             |
| 18 | 3 | 63  | 0.352144 | 0.036239 | -0.010661 | 92   | 61  | mir-582-3p;mir-141;mir-206                                                    |                                                                                                                                             |
| 19 | 6 | 80  | 0.194203 | 0.028009 | -0.008469 | 1274 | 118 | mir-488;let-7b*;let-7a*;let-7f-1*;mir-361-5p;mir-630                          |                                                                                                                                             |
| 20 | 6 | 44  | 0.142625 | 0.022868 | -0.016685 | 68   | 92  | mir-765;mir-324-3p;mir-137;mir-338-3p;mir-519c-3p;mir-15a*                    | U7 snRNP, spliceosomal complex, catalytic step 2 spliceosome, mRNA processing                                                               |
| 21 | 3 | 109 | 0.493175 | 0.080146 | -0.003825 | 6594 | 34  | let-7d;let-7b;mir-34a                                                         | tumor necrosis factor-mediated signaling pathway, induction of apoptosis, programmed cell death, cellular response to tumor necrosis factor |
| 22 | 7 | 146 | 0.153077 | 0.043636 | -0.007805 | 6592 | 139 | mir-185*;mir-200a;mir-744;mir-99a;mir-99b;mir-324-5p;mir-143*                 | cytosolic large ribosomal subunit, viral transcription, viral infectious cycle, ribosome, rRNA processing                                   |
| 23 | 7 | 103 | 0.116707 | 0.036921 | -0.002764 | 360  | 143 | mir-519a;mir-575;mir-518a-3p;mir-501-3p;mir-598;mir-10b;mir-337-5p            | typ2 fibroblast growth factor receptor binding, viral infectious cycle                                                                      |
| 24 | 6 | 176 | 0.271370 | 0.033961 | -0.008809 | 5380 | 161 | mir-454*;mir-297;mir-200c;mir-200b;mir-130b*;mir-429                          | insulin receptor substrate binding, regulation of cell motility, cell activation, cell migration, leukocyte migration                       |
| 25 | 6 | 100 | 0.189457 | 0.041726 | -0.000940 | 3340 | 111 | mir-107;mir-103;mir-135a;mir-34c-3p;mir-34b;mir-337-3p                        | U7 snRNP, spliceosomal snRNP assembly, U12-type spliceosomal complex                                                                        |
| 26 | 3 | 67  | 0.293141 | 0.023804 | -0.003539 | 124  | 84  | mir-181c;mir-222;mir-885-5p                                                   | U7 snRNP, spliceosomal snRNP assembly, U12-type spliceosomal complex                                                                        |
| 27 | 4 | 150 | 0.385310 | 0.043335 | -0.005580 | 6420 | 122 | mir-181a;mir-193b*;mir-584;mir-222                                            | U7 snRNP, spliceosomal snRNP assembly, U12-type spliceosomal complex, cis-trans isomerase activity                                          |
| 28 | 3 | 53  | 0.318788 | 0.027428 | -0.002548 | 144  | 41  | mir-142-3p;mir-518f;mir-592                                                   | CD40 receptor complex, regulation of JNK cascade, JUN kinase activity, regulation of I-kappaB kinase/NF-kappaB cascade                      |
| 29 | 5 | 54  | 0.176097 | 0.036215 | 0.000688  | 120  | 66  | mir-142-3p;let-7f*;mir-937;mir-602;mir-203                                    | cytosolic large ribosomal subunit, translational termination, viral replication, viral infectious cycle, ribosome                           |
| 30 | 2 | 61  | 0.458172 | 0.035994 | -0.029003 | 132  | 20  | mir-199a-5p;mir-196b                                                          | eukaryotic cell surface binding, platelet degranulation, response to hormone stimulus, fibrinogen complex                                   |

|    |   |    |          |          |           |      |     |                                                   |                                                                                                                   |
|----|---|----|----------|----------|-----------|------|-----|---------------------------------------------------|-------------------------------------------------------------------------------------------------------------------|
| 31 | 5 | 45 | 0.415015 | 0.052412 | -0.012146 | 50   | 89  | mir-221*,let-7a;let-7f;mir-217;mir-203            | laminin-10, laminin-11 complex, U7 snRNP                                                                          |
| 32 | 6 | 88 | 0.144199 | 0.026152 | -0.003597 | 1234 | 113 | mir-891a;let-7a;mir-193b;mir-425;mir-486-5p;mir-9 |                                                                                                                   |
| 33 | 4 | 72 | 0.285136 | 0.033364 | 0.017618  | 168  | 57  | mir-34b*;mir-508-3p;mir-126;mir-518d-5p           |                                                                                                                   |
| 34 | 4 | 86 | 0.278431 | 0.027148 | -0.003566 | 226  | 83  | mir-92b;mir-150*;mir-196a;mir-196b                | membrane attack complex, sarcomere, complement activation, titin binding, response to stimulus, chemical response |
| 35 | 3 | 47 | 0.237759 | 0.067964 | -0.002561 | 132  | 17  | mir-18a;let-7b;mir-375                            | cell adhesion, hemostasis, response to stimulus                                                                   |
| 36 | 4 | 12 | 0.256672 | 0.086306 | -0.005786 | 20   | 12  | mir-450a;mir-520c-3p;mir-133b;mir-659             | MAPKKK cascade, response to stress                                                                                |
| 37 | 3 | 57 | 0.266377 | 0.038625 | -0.005862 | 98   | 51  | mir-545;mir-135a*;mir-338-3p                      | transmembrane receptor protein kinase activity                                                                    |
| 38 | 5 | 46 | 0.210763 | 0.041924 | -0.025455 | 60   | 89  | mir-518e;mir-105;mir-25;mir-195;mir-365           |                                                                                                                   |
| 39 | 3 | 42 | 0.386768 | 0.061612 | -0.032561 | 58   | 28  | mir-141*;mir-16;mir-186                           | response to estradiol stimulus, sterol transport                                                                  |
| 40 | 3 | 54 | 0.367195 | 0.034767 | -0.019985 | 92   | 54  | mir-27b*;mir-135a;mir-873                         | ESC/E(Z) complex, PcG protein complex, histone methyltransferase complex                                          |

#### 4 Enrichment results of several modules from TCGA dataset

*Module 23* This module (Fig. 6) includes the miR-302 and miR-520 clusters. These two clusters are shown to display similar expression pattern in the differentiation of human embryonic stem cells [5]. Specifically, the miR-302 family is known for coordinately suppressing genes in the CDK2 and CDK4/6 cell cycle pathways [2]. Indeed, miRNAs in the miR-302 family were assigned to the same module by PIMiM indicating that the module-based approach can help in recovering cooperative regulation of groups of miRNAs. Among the top terms and gene sets from Gene Ontology and MSigDB enrichment analysis are: cell death, CD40 receptor complex, regulation of apoptosis, B cell immune response, TNF receptor signaling pathway, . . . (Table 3).

*Module 48* (Fig. 7 and Table 4) All miRNAs in this module were previously reported as active in cancer: miR-130a/b [6], miR-328 [3] and mirR-504 which negatively regulates tumor suppressor p53 [1]. Mutation of the gene hub CEBPE is shown to increase the risk of acute leukemia[4].

(a) GO

| ID         | Name                                                                                | Adj.P-value |
|------------|-------------------------------------------------------------------------------------|-------------|
| GO:0033276 | transcription factor TFIIIC complex                                                 | <0.001      |
| GO:0070461 | SAGA-type complex                                                                   | <0.001      |
| GO:0000123 | histone acetyltransferase complex                                                   | <0.001      |
| GO:0005669 | transcription factor TFIID complex                                                  | <0.001      |
| GO:0005667 | transcription factor complex                                                        | <0.001      |
| GO:0044428 | nuclear part                                                                        | <0.001      |
| GO:0016578 | histone deubiquitination                                                            | <0.001      |
| GO:0006352 | transcription initiation, DNA-dependent                                             | <0.001      |
| GO:0019219 | regulation of nucleobase, nucleoside, nucleotide and nucleic acid metabolic process | <0.001      |
| GO:0051171 | regulation of nitrogen compound metabolic process                                   | <0.001      |

(b) MSigDB

| Gene Set Name                                     | Description                                                          | P value  |
|---------------------------------------------------|----------------------------------------------------------------------|----------|
| MIPS TFIIIC COMPLEX                               | TFIIIC complex (TATA-binding protein-free TAF-II-containing complex) | 0E0      |
| MIPS GCN5 TRRAP HISTONE ACETYLTRANSFERASE COMPLEX | GCN5-TRRAP histone acetyltransferase complex                         | 0E0      |
| KEGG BASAL TRANSCRIPTION FACTORS                  | Basal transcription factors                                          | 5.55E-16 |
| MIPS TFIID BETA COMPLEX                           | TFIID-beta complex                                                   | 1.86E-13 |
| MIPS TFIID BETA COMPLEX 1                         | TFIID-beta complex                                                   | 1.86E-13 |
| MIPS STAGA COMPLEX                                | STAGA complex (SPT3-TAF9-GCN5 acetyltransferase complex)             | 3.02E-13 |
| MIPS DA COMPLEX                                   | DA complex                                                           | 7.05E-13 |
| MIPS PCAF COMPLEX                                 | PCAF complex                                                         | 7.85E-11 |
| MIPS TFIID COMPLEX                                | TFIID complex                                                        | 1.85E-10 |
| MIPS TFIID COMPLEX B CELL SPECIFIC                | TFIID complex, B-cell specific                                       | 1.85E-10 |

**Table 2.** Enrichment analysis of the set of genes in Module 11.



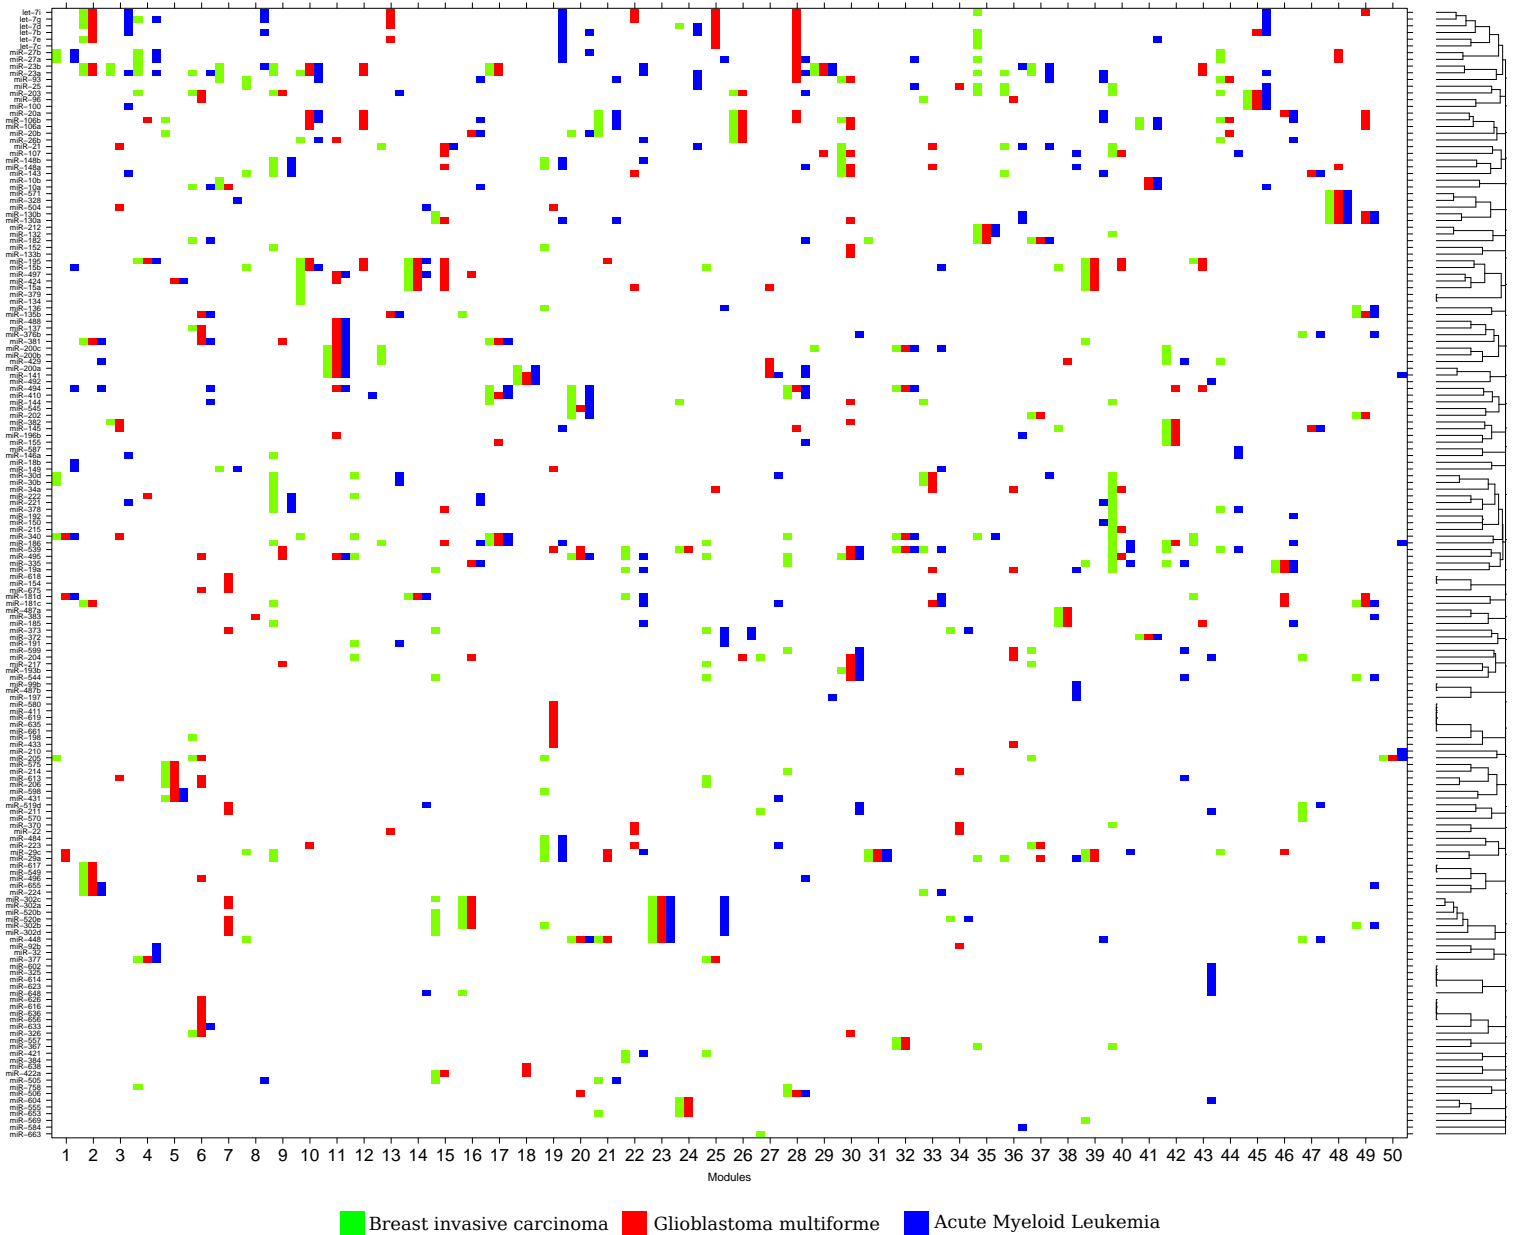

**Fig. 5.** Inferred miRNA modules of the three cancer types (BRCA, GBM and AML). The x-axis shows the  $50 \times 3$  modules learned for the three cancer types (each x-axis bar is subdivided into 3 with the color corresponding to the cancer type). The y-axis shows miRNAs ordered by hierarchical clustering of their module membership vector. As can be seen, in several cases the same miRNAs are predicted for all or two of the three cancer types.

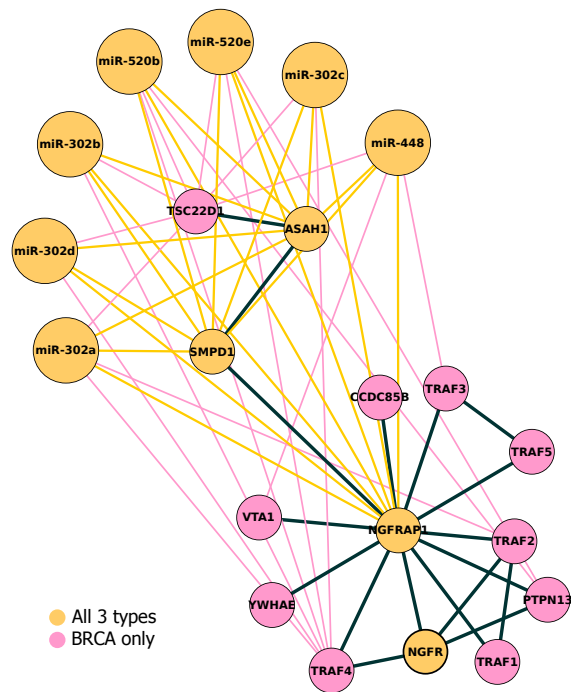

Fig. 6. Network of miRNAs and mRNAs of Module 23.

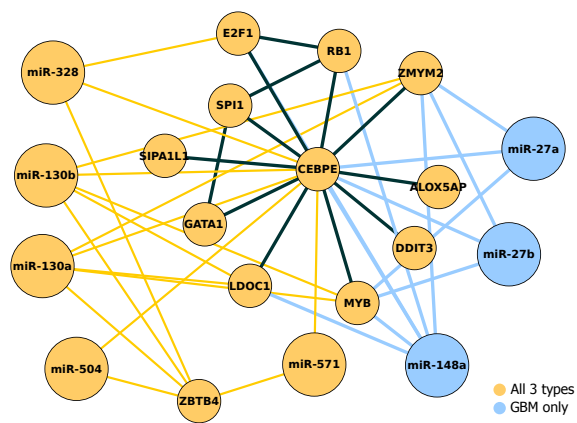

Fig. 7. Network of miRNAs and mRNAs of Module 48.

## (a) GO

| ID         | Name                                                                      | Adj. P-value |
|------------|---------------------------------------------------------------------------|--------------|
| GO:0010941 | regulation of cell death                                                  | <0.001       |
| GO:0010942 | positive regulation of cell death                                         | <0.001       |
| GO:0035631 | CD40 receptor complex                                                     | <0.001       |
| GO:0042981 | regulation of apoptosis                                                   | <0.001       |
| GO:0043065 | positive regulation of apoptosis                                          | <0.001       |
| GO:0043067 | regulation of programmed cell death                                       | <0.001       |
| GO:0043068 | positive regulation of programmed cell death                              | <0.001       |
| GO:0008624 | induction of apoptosis by extracellular signals                           | 0.004        |
| GO:0009898 | internal side of plasma membrane                                          | 0.005        |
| GO:0006917 | induction of apoptosis                                                    | 0.015        |
| GO:0012502 | induction of programmed cell death                                        | 0.015        |
| GO:0048522 | positive regulation of cellular process                                   | 0.015        |
| GO:0048518 | positive regulation of biological process                                 | 0.031        |
| GO:0004842 | ubiquitin-protein ligase activity                                         | 0.032        |
| GO:0019787 | small conjugating protein ligase activity                                 | 0.041        |
| GO:0051090 | regulation of sequence-specific DNA binding transcription factor activity | 0.047        |
| GO:0051092 | positive regulation of NF-kappaB transcription factor activity            | 0.047        |
| GO:0035304 | regulation of protein dephosphorylation                                   | 0.05         |

## (b) MSigDB

| Gene Set Name                                         | Description                                                                             | P value |
|-------------------------------------------------------|-----------------------------------------------------------------------------------------|---------|
| KEGG SMALL CELL LUNG CANCER                           | Small cell lung cancer                                                                  | 1.62E-9 |
| BIOCARTA TALL1 PATHWAY                                | TACI and BCMA stimulation of B cell immune responses                                    | 1.02E-7 |
| BIOCARTA TNFR2 PATHWAY                                | TNFR2 Signaling Pathway                                                                 | 1.82E-7 |
| PID CD40 PATHWAY                                      | CD40/CD40L signaling                                                                    | 9.97E-7 |
| SIG CD40 PATHWAY MAP                                  | Genes related to CD40 signaling                                                         | 1.33E-6 |
| KEGG PATHWAYS IN CANCER                               | Pathways in cancer                                                                      | 1.48E-6 |
| PID TNF PATHWAY                                       | TNF receptor signaling pathway                                                          | 3.35E-6 |
| PID CERAMIDE PATHWAY                                  | Ceramide signaling pathway                                                              | 3.81E-6 |
| LAU APOPTOSIS CDKN2A UP                               | Genes up-regulated by UV-irradiation in cervical cancer cells after knockdown of CDKN2A | 5.77E-6 |
| REACTOME CELL DEATH SIGNALING VIA NRAGE NRIF AND NADE | Genes involved in Cell death signalling via NRAGE, NRIF and NADE                        | 7.51E-6 |

**Table 3.** Enrichment analysis of the set of genes in Module 23.

## (a) GO

| ID         | Name                                                                                | Adj.P-value |
|------------|-------------------------------------------------------------------------------------|-------------|
| GO:0071930 | negative regulation of transcription involved in G1/S phase of mitotic cell cycle   | 0.005       |
| GO:0035189 | Rb-E2F complex                                                                      | 0.008       |
| GO:0000122 | negative regulation of transcription from RNA polymerase II promoter                | 0.01        |
| GO:0005634 | nucleus                                                                             | 0.032       |
| GO:0003700 | sequence-specific DNA binding transcription factor activity                         | 0.033       |
| GO:0001071 | nucleic acid binding transcription factor activity                                  | 0.033       |
| GO:0003677 | DNA binding                                                                         | 0.038       |
| GO:0019219 | regulation of nucleobase, nucleoside, nucleotide and nucleic acid metabolic process | 0.045       |

## (b) MSigDB

| Gene Set Name                                | Description                                                                                                                                                                        | P value |
|----------------------------------------------|------------------------------------------------------------------------------------------------------------------------------------------------------------------------------------|---------|
| PID HES HEYPATHWAY                           | Notch-mediated HES/HEY network                                                                                                                                                     | 1.1E-8  |
| MARKS ACETYLATED NON HISTONE PROTEINS        | Non-histone proteins that are acetylated                                                                                                                                           | 6.14E-8 |
| PARK TRETINOIN RESPONSE AND RARA PLZF FUSION | Genes up-regulated by tretinoin (all-trans retinoic acid, ATRA) in U937 cells (acute promyelocytic leukemia, APL) made resistant to the drug by expression of the PLZF-RARA fusion | 2.08E-7 |
| PARK TRETINOIN RESPONSE AND PML RARA FUSION  | Genes up-regulated by tretinoin (all-trans retinoic acid, ATRA) in U937 cells (acute promyelocytic leukemia, APL) made sensitive to the drug by expression of the PML-RARA fusion  | 5.46E-7 |
| MAGRANGEAS MULTIPLE MYELOMA IGLL VS IGLK UP  | Up-regulated genes discriminating multiple myeloma samples by the type of immunoglobulin light chain they produce: Ig lambda (IGLL) vs Ig kappa (IGLK)                             | 1.54E-6 |
| TONKS TARGETS OF RUNX1 RUNX1T1 FUSION HSC DN | Genes down-regulated in normal hematopoietic progenitors by RUNX1-RUNX1T1 fusion.                                                                                                  | 2.67E-6 |
| PID RB 1PATHWAY                              | Regulation of retinoblastoma protein                                                                                                                                               | 5.81E-6 |
| RAMJAUN APOPTOSIS BY TGFB1 VIA MAPK1 DN      | Apoptotic genes dependent on MAPK1 and down-regulated in AML12 cells (hepatocytes) after stimulation with TGFB1                                                                    | 8.09E-6 |
| QI PLASMACYTOMA UP                           | Up-regulated genes that best discriminate plasmablastic plasmacytoma from plasmacytic plasmacytoma tumors                                                                          | 9.69E-6 |
| PID CMYB PATHWAY                             | C-MYB transcription factor network                                                                                                                                                 | 1.26E-5 |

**Table 4.** Enrichment analysis of the set of genes in Module 48.

## References

1. Wenwei Hu, Chang S Chan, Rui Wu, Cen Zhang, Yvonne Sun, Jun S Song, Laura H Tang, Arnold J Levine, and Zhaohui Feng. Negative regulation of tumor suppressor p53 by microRNA mir-504. *Molecular cell*, 38(5):689–699, 2010.
2. S.L. Lin, D.C. Chang, S.Y. Ying, D. Leu, and D.T.S. Wu. MicroRNA mir-302 inhibits the tumorigenicity of human pluripotent stem cells by coordinate suppression of the cdk2 and cdk4/6 cell cycle pathways. *Cancer research*, 70(22):9473–9482, 2010.
3. Yu-Zhuo Pan, Marilyn E Morris, and Ai-Ming Yu. MicroRNA-328 negatively regulates the expression of breast cancer resistance protein (bcrp/abcg2) in human cancer cells. *Molecular pharmacology*, 75(6):1374–1379, 2009.
4. Pauline Peyrouze, Soizic Guihard, Nathalie Grardel, Céline Berthon, Nicolas Pottier, Arnaud Pigneux, Jean-Yves Cahn, Marie Christine Béné, Véronique Lhéritier, Eric Delabesse, et al. Genetic polymorphisms in *arid5b*, *cebpe*, *ikzf1* and *cdkn2a* in relation with risk of acute lymphoblastic leukaemia in adults: a group for research on adult acute lymphoblastic leukaemia (graall) study. *British journal of haematology*, 159(5):599–613, 2012.
5. Jiaqiang Ren, Ping Jin, Ena Wang, Francesco M Marincola, and David F Stroncek. MicroRNA and gene expression patterns in the differentiation of human embryonic stem cells. *Journal of Translational Medicine*, 7(1):20, 2009.
6. S. Volinia, M. Galasso, S. Costinean, L. Tagliavini, G. Gamberoni, A. Drusco, J. Marchesini, N. Mascellani, M.E. Sana, R.A. Jarour, et al. Reprogramming of mirna networks in cancer and leukemia. *Genome research*, 20(5):589–599, 2010.
